# Supplementary material
Source: PubMed Central journal article supplement (PMC4397653)

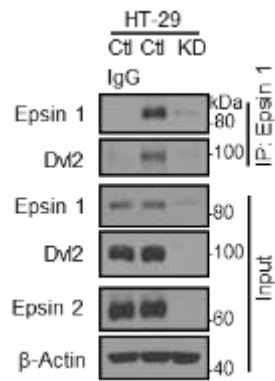

**Supplementary Figure 1. Epsin 1 constitutively interacted with Dvl2.** Co-immunoprecipitation of endogenous Dvl2 by anti-epsin 1 antibody in control and epsin-deficient (KD) HT-29 cells analyzed by Western blotting. Representative Western blot from n=6.

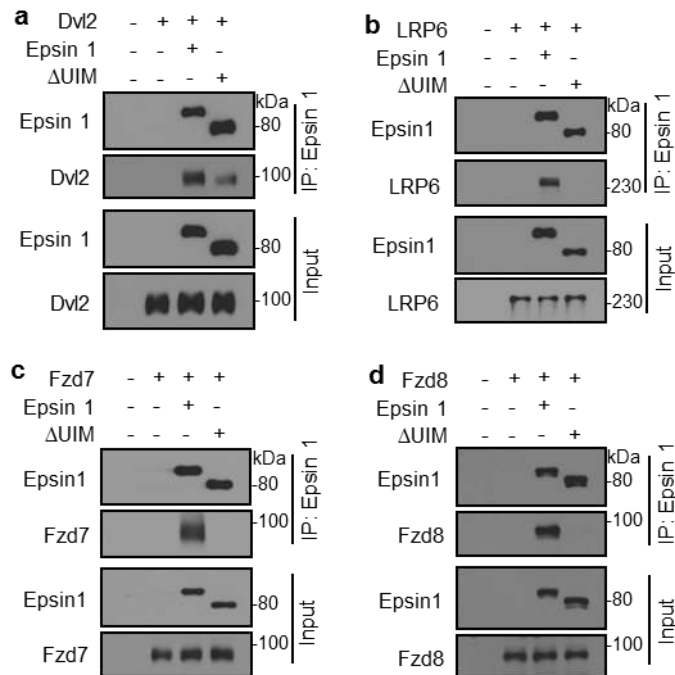

**Supplementary Figure 2. Epsin UIM was required for Wnt-dependent interaction with the Wnt receptors. (a-d)** HEK 293T cells were co-transfected with Dvl2 **(a)** LRP6 **(b)**, Fzd7 **(c)** or Fzd8 **(d)** and either full length epsin 1 or epsin 1 ΔUIM. After Wnt3a stimulation ( $100 \text{ ng mL}^{-1}$ , 5 min), complexes were co-immunoprecipitated by anti-epsin 1 antibody then analyzed by Western blotting for Dvl2 **(a)** LRP6 **(b)**, Fzd7 **(c)** or Fzd8 **(d)**. Representative Western blot from n=6.

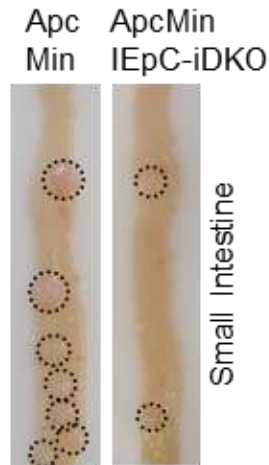

**Supplementary Figure 3. Epsin depletion protected against intestinal tumor development in  $Apc^{Min}$  mice.** Representative image of longitudinally cut small intestines from  $Apc^{Min}$  and  $Apc^{Min}/IEpC-DKO$  mice sacrificed at 20 weeks of age; circles indicate tumors in the small intestine. Representative image from  $n=11$ .

**Supplementary Figure 4.** Full scans of Western blots in the main text and in supplementary information.

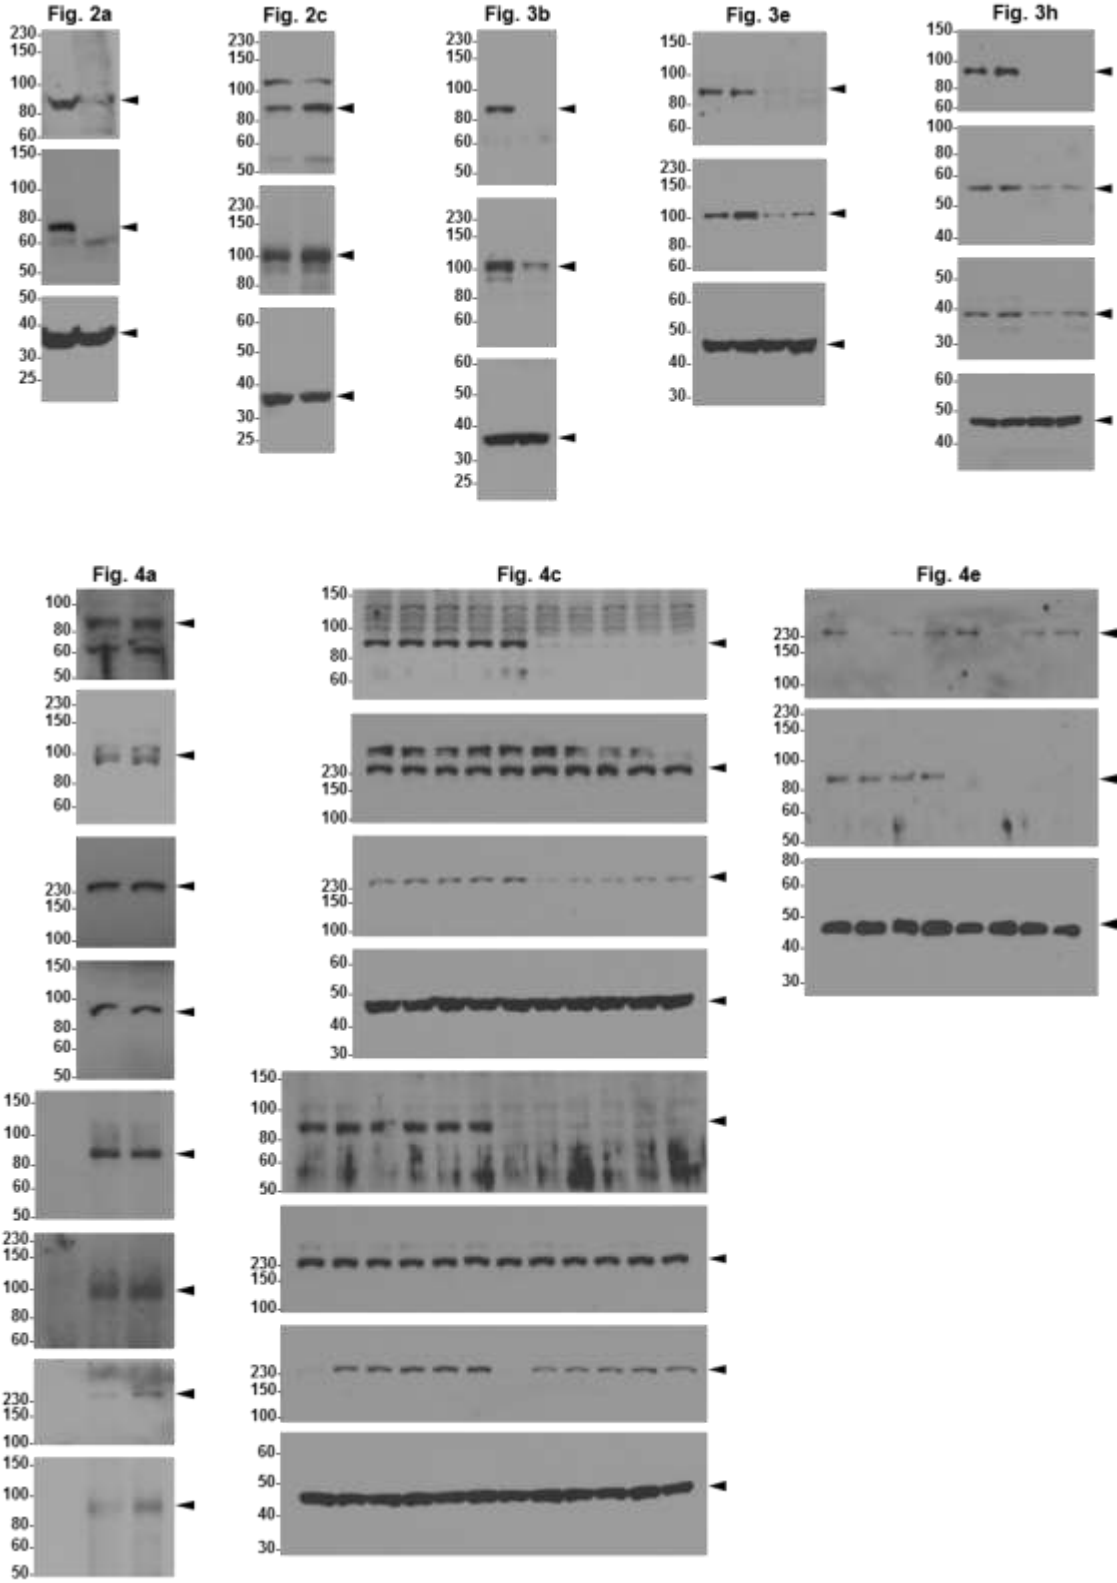

**Supplementary Figure 4.** Full scans of Western blots in the main text and in supplementary information.

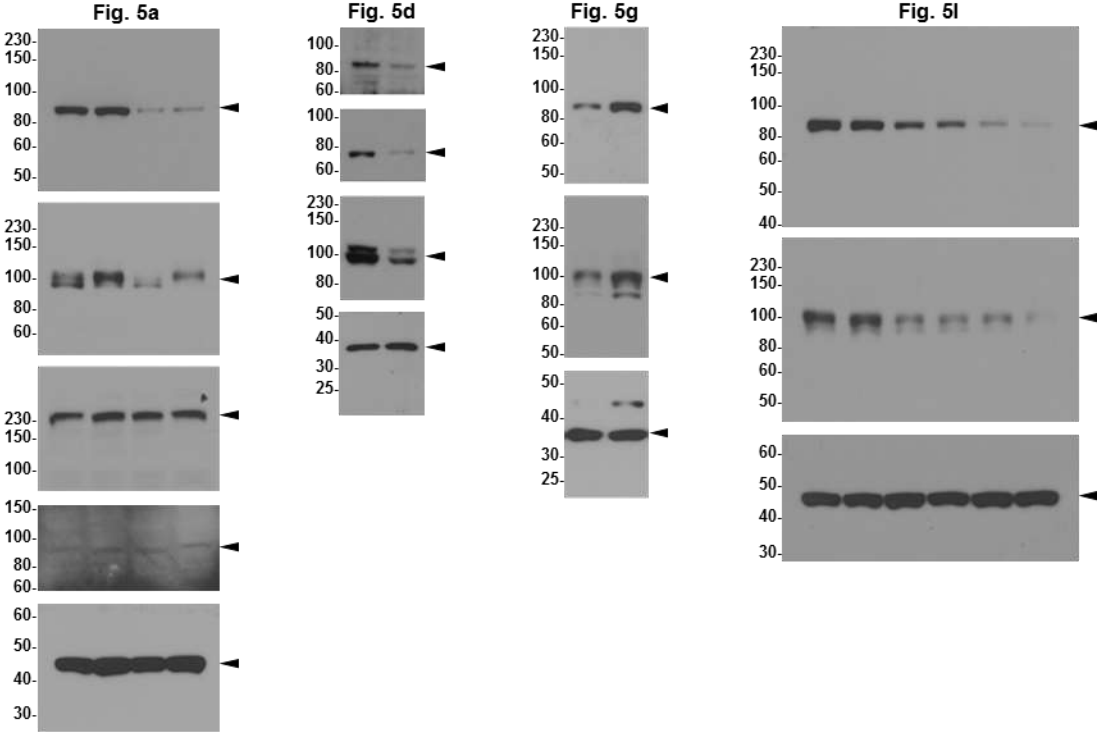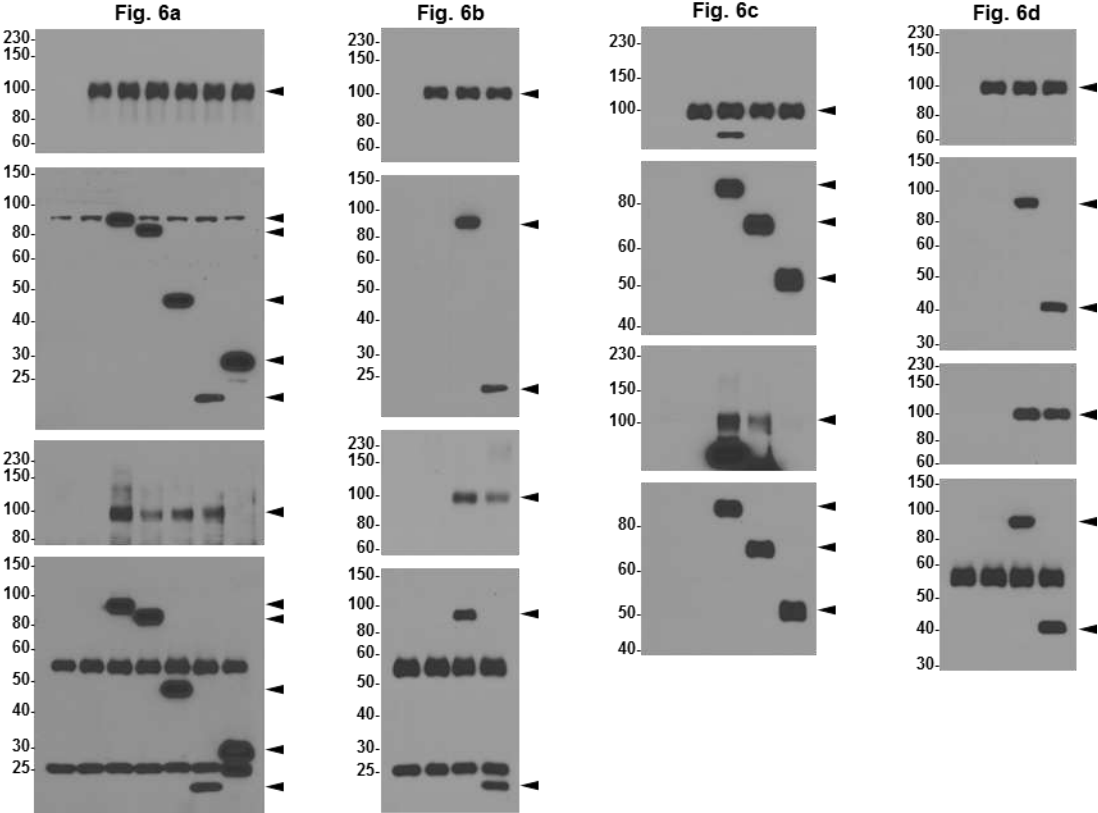

**Supplementary Figure 4.** Full scans of Western blots in the main text and in supplementary information.

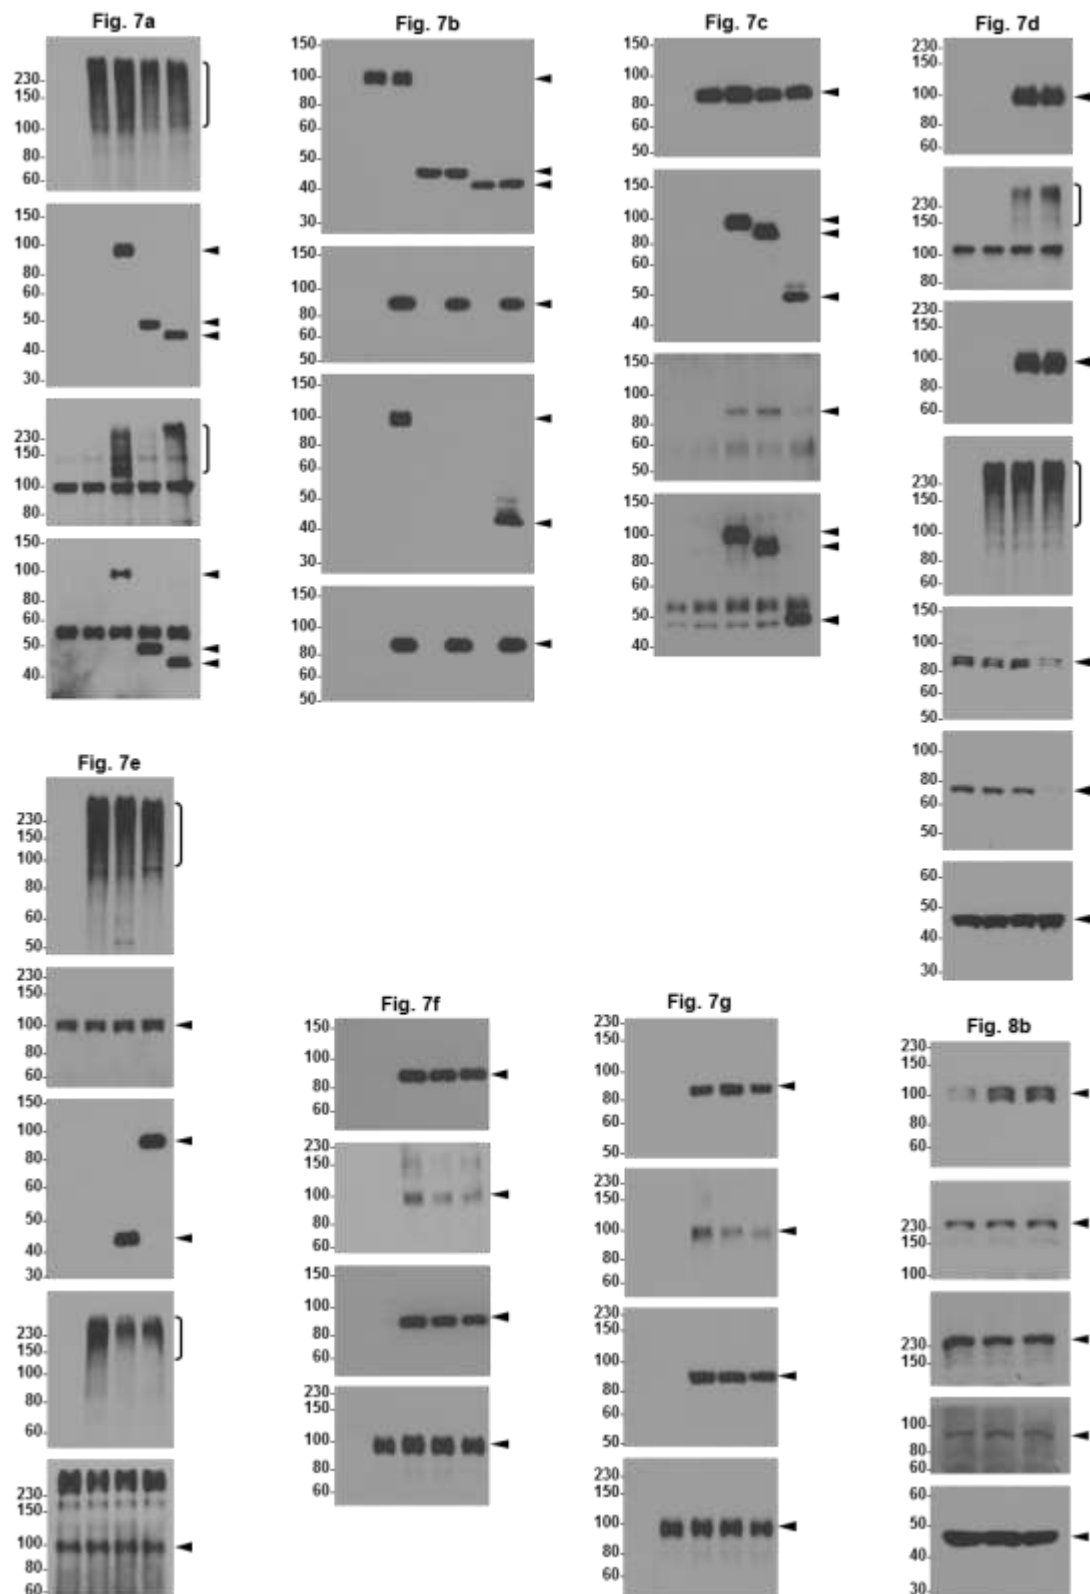

**Supplementary Figure 4.** Full scans of Western blots in the main text and in supplementary information.

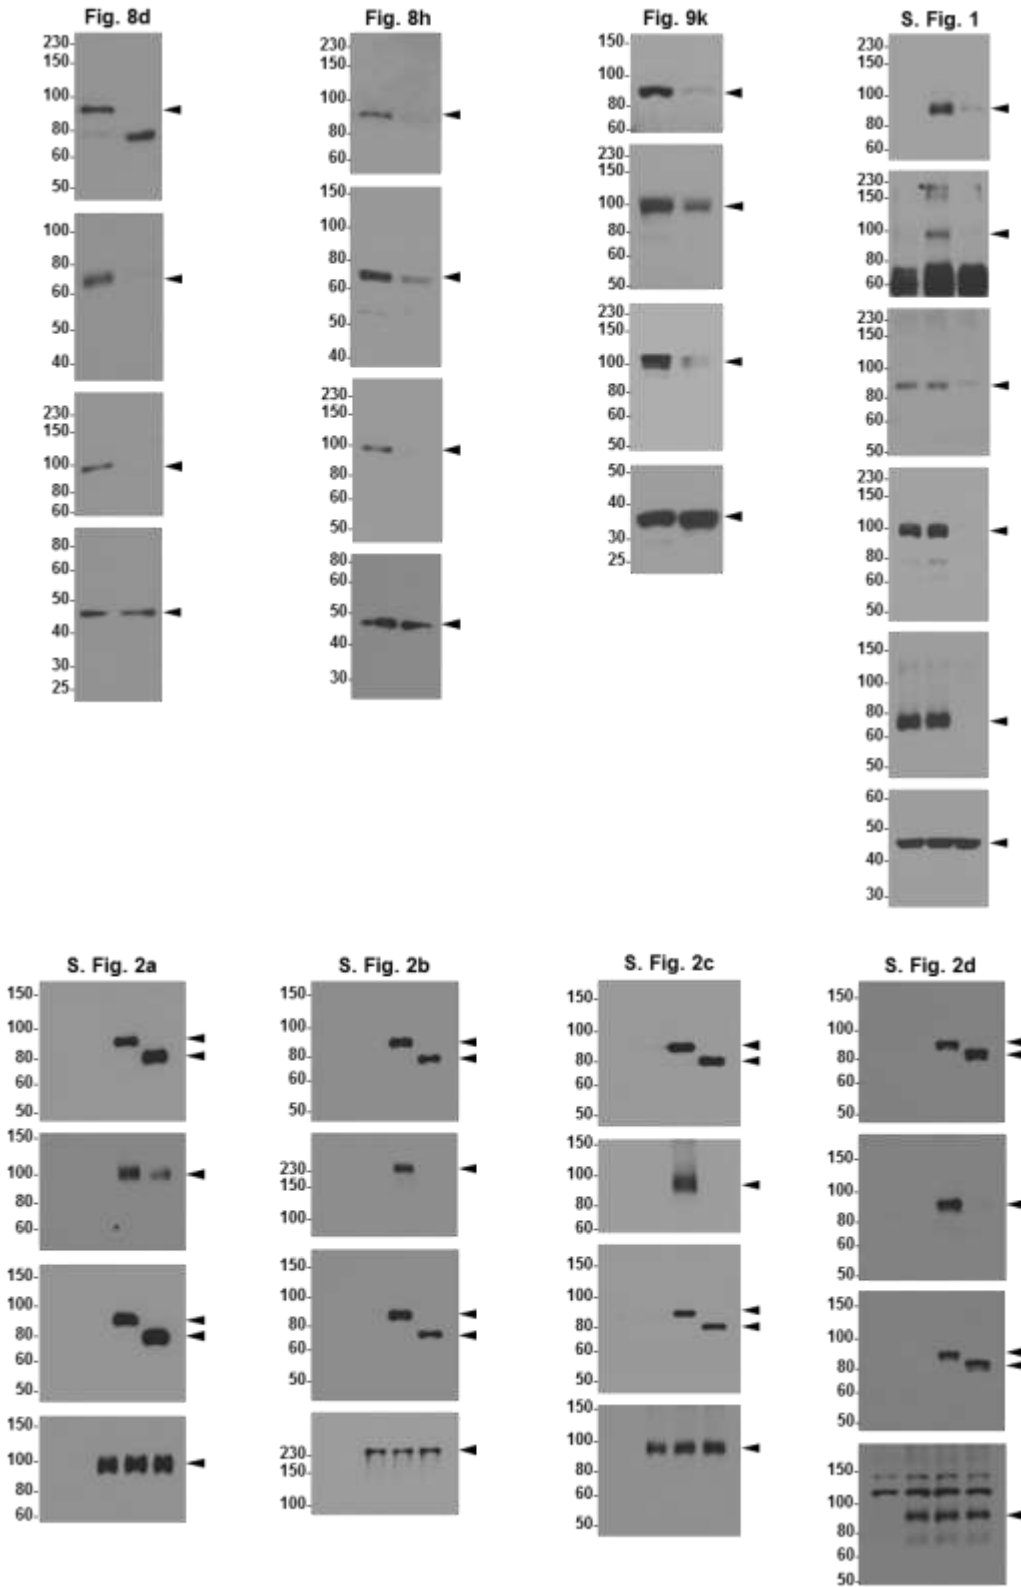

Supplement: NIHMS658902-supplement-1.pdf [file NIHMS658902-supplement-1.pdf]
